# Supplementary material for: Identifying novel gene dysregulation associated with opioid overdose death: A meta-analysis of differential gene expression in human prefrontal cortex
Source: PubMed Central journal article supplement — medRxiv. 2024 Jan 13:2024.01.12.24301153. Preprint. [Version 1] doi: 10.1101/2024.01.12.24301153 (PMC10802752; doi:10.1101/2024.01.12.24301153), 2024-01-13

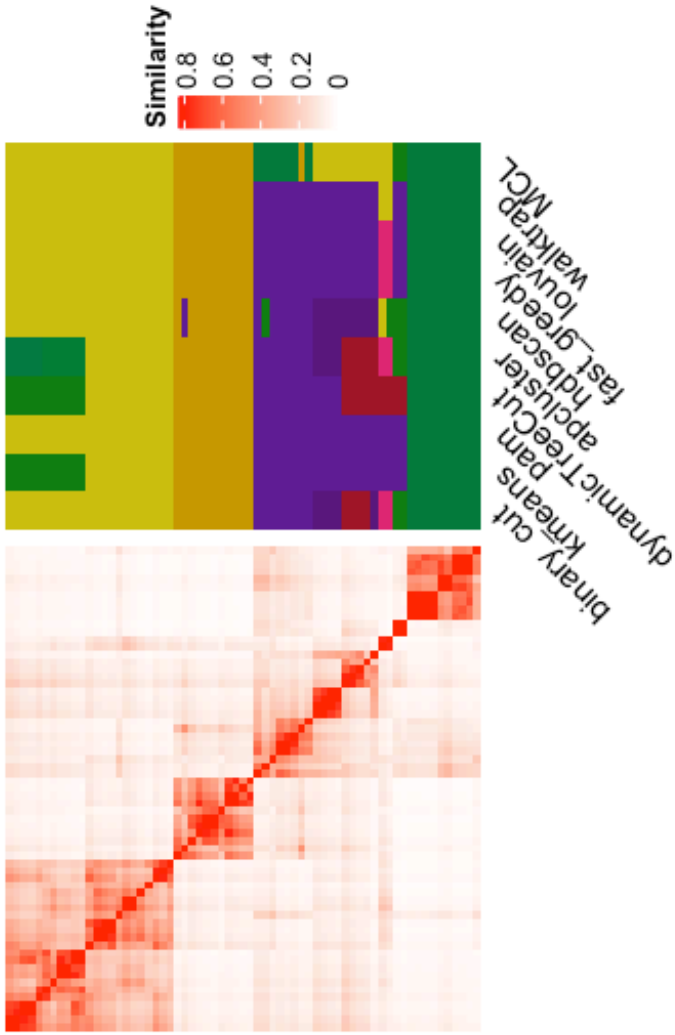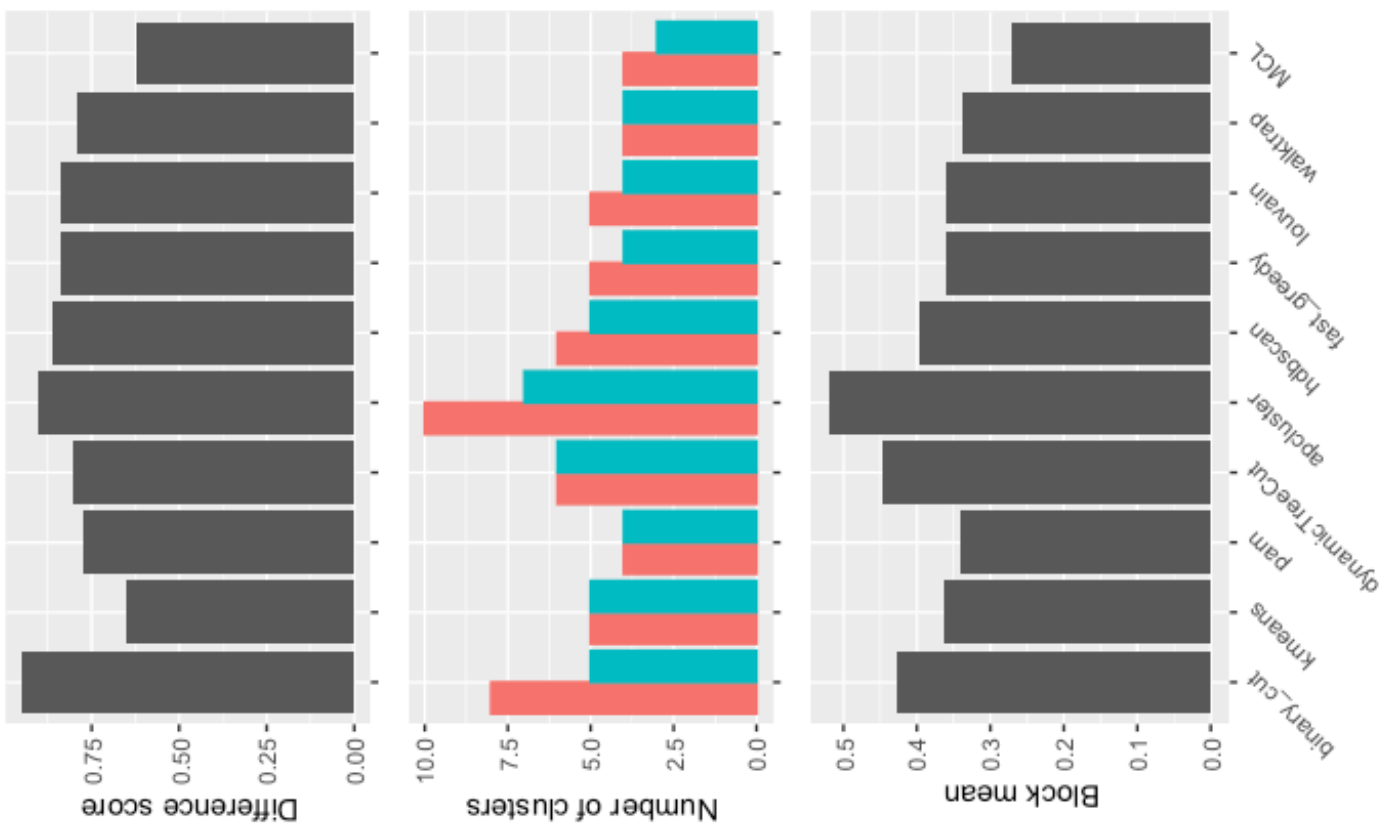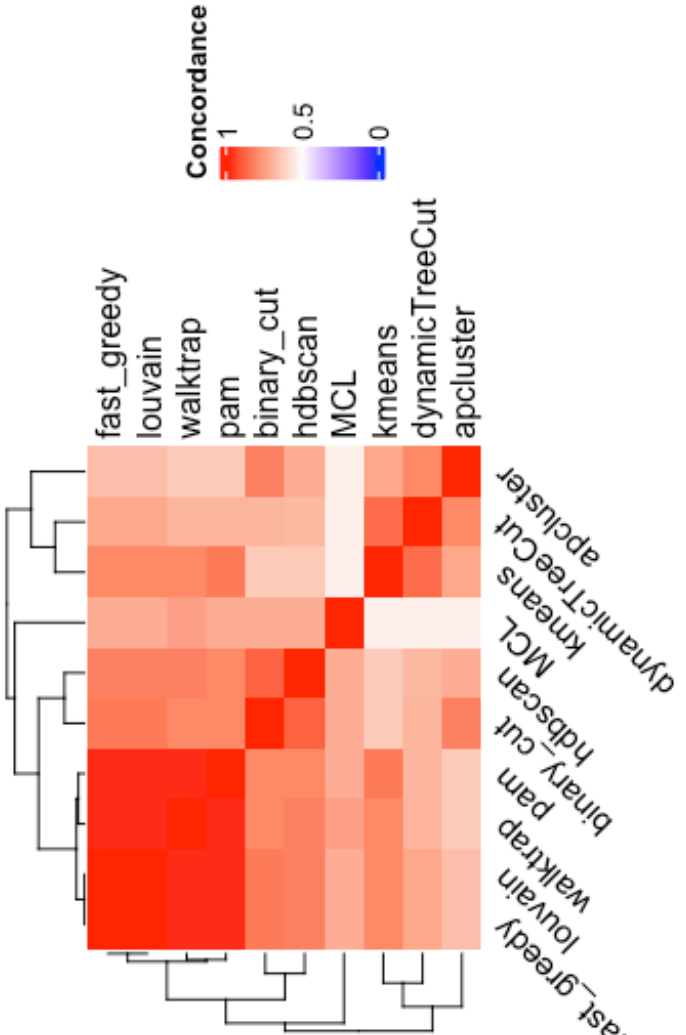

Supplement: media-1.pdf [file media-1.pdf]
